# Supplementary material
Source: PubMed Central journal article supplement (PMC1180774)

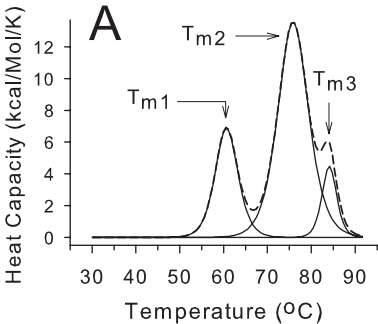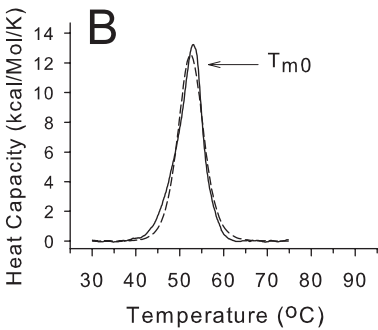

Supplement: pnas_0502515102_1.pdf [file pnas_0502515102_1.pdf]

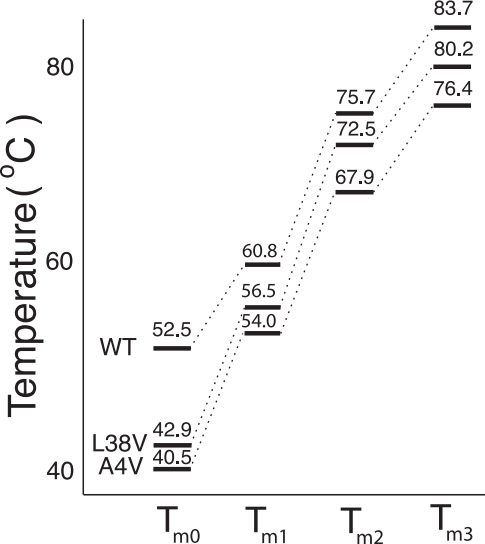

Supplement: pnas_0502515102_2.pdf [file pnas_0502515102_2.pdf]
